# Supplementary material for: FUSE binding protein 1 (FUBP1) expression is upregulated by T-cell acute lymphocytic leukemia protein 1 (TAL1) and required for efficient erythroid differentiation
Source: PLoS One. 2019 Jan 17;14(1):e0210515. doi: 10.1371/journal.pone.0210515 (PMC6336336; doi:10.1371/journal.pone.0210515)
Supplement: S1 Data — The data points from which graphs and statistics have been calculated are provided. (XLSX) [file pone.0210515.s006.xlsx]

## Sheet: Fig1
Fig1 B: Relative FUBP1 mRNA expression in cell lines and CD34+ cells
HEK293T	CD34+	K562	HL-60
4.802735	3.396046	2.875587	2.209709
4.328467	3.564887	2.60965	1.937043
4.512279	3.372588	2.573722	1.977745
3.443454	3.874087	11.26563	2.451825
3.515808	4.010706	12.15819	3.467405
3.515808	4.038603	11.74403	2.555944
6.121377	4.152143	4.607091	2.758447
7.179365	3.768149	4.869779	2.796953
6.606363	3.928167	4.671404	2.72047
Fig 1 C: relative TAL1 mRNA expression in cell lines and CD34+ cells
HEK293T	CD34+	K562	HL-60
0.0109256	0.6615198	0.464534	0.002602035
0.009577443	0.7238969	0.4128977	0.002867196
0.01162888	0.666121	0.4245058	0.002620134
0.0092512	0.5048254	0.401607	0.002750398
0.008280056	0.5154328	0.3695538	0.003225763
0.008752168	0.5154328	0.401607	0.00340969
0.009187297	0.8668512	0.4100456	0.002769529
0.009445587	0.803214	0.401607	0.002638358
0.008395641	0.7442484	0.3852471	0.002788792
Fig1 D: normalized FUBP1 and TAL1 expression in CD34+ cells after erythroid differentiation
FUBP1				TAL1
Day 0	Day 7	Day 10		Day 0	Day 7	Day 10
1.12654	1.21841	3.138336		1.12654	2.106722	5.91755
0.88354	1.526259	5.223439		0.88354	1.235419	1.607702
0.98984	1.630145	3.693529		0.98984	1.783857	3.434262
Fig1 E: normalized FUBP1 and TAL1 expression in CD34+ cells after megakaryocytic differentiation
FUBP1				TAL1
Day 0	Day 7	Day 10		Day 0	Day 7	Day 10
1.07435	1.347234	0.05310531		1.07435	2.8481000	4.18434
0.96112	1.101905	1.624505		0.96112	6.703897	5.388934
0.9898454	1.021012	1.021012		0.9898454	4.242751	8.310873

## Sheet: Fig2
Fig2 A: relative FUBP1 mRNA expression after knockdown of TAL1 in K562 cells normalized
sh ctrl	sh TAL1
1.16918	1.06
0.83096	1.09
1.00	1.50
Fig2 B: relative TAL1 and FUBP1 mRNA expression after knockdown of TAL1 in CD34+ cells
relative TAL1 expression			relative FUBP1 expression
sh ctrl	sh TAL1		sh ctrl	sh TAL1
0.8645372	0.4897102		1.059461	0.3618165
0.8585654	0.5586436		0.8370177	0.4185088
1.347234	0.6070974		1.127658	0.369419
Fig2 C: relative FUBP1 mRNA expression after overexpression of TAL1 in K562 cells
ctrl	TAL1
1.11112	1.292
0.89098	1.548
1.0	1.410
1.0	1.180
Fig2 D: relative TAL1 and FUBP1 mRNA expression after overexpression of TAL1 in CD34+ cells
relative TAL1 expression			relative FUBP1 expression
ctrl	TAL1		ctrl	TAL1
1.018679	76.99538		1.081475	2.254801
1.011643	71.83923		0.9814591	2.118437
0.9704326	70.3608		0.9414785	1.935894
Fig2 E: relative GATA1 and FUBP1 mRNA expression after knockdown of GATA1 in K562 cells
relative GATA1 expression				relative FUBP1 expression
sh ctrl	sh1 GATA1	sh2 GATA1		sh ctrl	sh1 Gata1	sh2 GATA1
0.9908029	0.2511585	0.4464808		0.9012505	0.5625293	0.7791646
0.8331626	0.2232404	0.4622259		0.8585654	0.6285067	0.7022225
1.211396	0.2359691	0.4495863		1.292353	0.6198539	0.7900413
Fig2 F: relative GATA1 and FUBP1 mRNA expression after overexpression of GATA1 in K562 cells
relative GATA1 expression			relative FUBP1 expression
ctrl	GATA1		ctrl	GATA1
0.99	31.0		1.04	1.6
0.96	26.58		0.99	1.37
1.04	27.79		0.97	1.46

## Sheet: Fig3
Fig3 B: ChIP in K562 cells. % Input
	TAL1 precipitation									IgG
FUBP1 P1	0.84	0.92	0.479	0.489	0.375				FUBP1 P1	0.19	0.13	0.18	0.24	0.18
FUBP1 P2	1.66	2.21	0.904	0.746	0.871				FUBP1 P2	0.56	0.47	0.43	0.45	0.45
GAPDH E6	0	0	0	0	0				GAPDH E6	0	0	0	0	0
	GATA1 precipitation									IgG
FUBP1 P1	0.1050287	0.119813	0.1772498	0.1371528	0.63	0.671	0.595		FUBP1 P1	0.001017226	0.001596199	0.001547179	0.003094359	0.018	0.024	0.018
FUBP1 P2	0.2970662	0.2810417	0.2980975	0.3107564	0.649	0.795	0.966		FUBP1 P2	0.01059007	0.005519893	0.01511294	0.01490487	0.043	0.045	0.045
GAPDH E6	0	0	0	0	0	0			GAPDH E6	0	0	0	0	0	0
	POLII precipitation									IgG
FUBP1 P1	1.87	1.85	2.86	2.872	3.062				FUBP1 P1	0.19	0.13	0.018	0.024	0.018
FUBP1 P2	4.36	4.58	9.352	10.196	8.966				FUBP1 P2	0.56	0.47	0.043	0.045	0.045
GAPDH E6	0.641	0.8	0.742	0.954	0.748				GAPDH E6	0	0	0	0	0
Fig3 C: ChIP in CD34+ cells. fold change IgG
		TAL1 precipitation									IgG
FUBP1 P2 undiff.		2.456911	3.153263	5.241574	8.055644				FUBP1 P2 undiff.		0.7104699	1.28953	1.00001	1.00006
FUBP1 P2 erythroid diff.		15.66629	12.99236	19.15966	27.09585				FUBP1 P2 erythroid diff.		0.9135728	1.086427	1.0	1.0
		GATA1 precipitation									IgG
FUBP1 P2 undiff.		0.6133506	0.9558021	11.99853	11.11769	6.219829	9.427498		FUBP1 P2 undiff.		0.9826733	1.017327	0.9826744	1.017328	0.5691476	1.430852
FUBP1 P2 erythroid diff.		10.54729	12.63016	20.17922	20.31958	30.82258	24.35111		FUBP1 P2 erythroid diff.		1.124123	0.8758772	0.7817605	1.21824	0.3574754	1.642525
		POLII precipitation									IgG
FUBP1 P2 undiff.		10.77787	9.12611	15.52849	14.48859				FUBP1 P2 undiff.		0.7104699	1.28953	1.00001	1.00006
FUBP1 P2 erythroid diff.		74.45295	87.42657	43.70091	43.39905				FUBP1 P2 erythroid diff.		0.9135728	1.086427	1	1
									same values as for TAL1 precipitation, as they were performed in one experiment

## Sheet: Fig4
Fig4 B: Luciferase Assay
PGL4.10+TAL1+E47	-0.5 kb FUBP1	-0.5 kb FUBP1 + TAL1	-0.5 kb FUBP1 + E47	-0.5 kb FUBP1+TAL1+E47	-0.5 kb FUBP1 E-box M1 + TAL1 +E47	-0.5 kb FUBP1 E-box M2 + TAL1 +E47	-0.5 kb FUBP1 GATA M1 + TAL1 +E47	-0.5 kb FUBP1 GATA M2+TAL1+E47
0.9333117	43.06243	40.26726	95.84505	184.2	115.5392	42.78	7.100466	9.674136
1.066688	51.74535	49.78322	-	59.12	61.33643	57.37	7.072281	12.41735
0.9582051	27.16676	20.51262	50.77138	73.67	69.93513	131.1937	2.739045	4.053071
1.041795	32.16903	24.46557	66.36407	78.32	85.71301	67.27371	3.602456	4.946332
0.8198391	19.57984	22.22043	45.83454	70.45			3.381772	4.416796
1.193575	24.27925	20.78156	40.62323	76.58			2.271265	4.279128
Fig4 C: Luciferase Assay
PGL4.10+TAL1+E47	-0.5 kb FUBP1	-0.5 kb FUBP1+GATA1	-0.5 kb FUBP1+TAL1+E47	-0.5 kb FUBP1+TAL1+E47+GATA1	-0.5 kb FUBP1 GATA M1+TAL1+E47+GATA1	-0.5 kb FUBP1+E47+GATA1	-0.5 kb FUBP1 GATA M1+E47+GATA1
0.000155494	1.002262	0.7029227	1.518086	1.559763	4.549575	0.1050824	0.1044244
0.0002116062	0.9566275	0.8952639	1.555217	1.66545	4.165741	0.1003182	0.1061406
0.0003389398	1.005243	0.8229009	1.878476	1.497615	3.766067	0.09525956	0.1205471
0.0004482857	1.035867	0.7564287	1.8314	1.459201	3.710978	0.110031	0.120022
Fig4 D: relative GATA mRNA expression in HEK293T cells
Shown in Figure							Second Experiment not shown in Figure
GATA1	GATA2	GATA3	GATA4	GATA5	GATA6		GATA1	GATA2	GATA3	GATA4	GATA5	GATA6
0.0318902001356345	0.00992945493741814	0.631075375346019	1.45077845798581	0.349313348059955	2.17017207046195		0.02	0.01	0.44	1.8	0.16	0.87
0.0370181182398249	0.0124630055817226	0.589683386946367	1.32174951319155	0.385100879460073	2.10016046296321		0.03	0.01	0.47	1.67	0.15	0.87
0.0355855486950034	0.0114136326372967	0.582907315725999	1.18965067984821	0.221470711144384	1.87288971529367		0.02	0.01	0.5	1.86	0.13	0.75
Fig4 E: relative GATA mRNA expression in K562 cells
Shown in Figure							Second Experiment not shown in Figure
GATA1	GATA2	GATA3	GATA4	GATA5	GATA6		GATA1	GATA2	GATA3	GATA4	GATA5	GATA6
11.1226285032155	0.0269313272545214	0.00338950009633025	0.00150777077771875	0.1733253	0.01364417		20.79	0.06	0.01	0	0.16	0.19
11.9831831937226	0.02353413528041	0.00351568296870726	0.00219245865808272	0.2014764	0.01300057		20.72	0.06	0.01	0	0.19	0.2
11.4625050771515	0.0243715582181067	0.0029349996643121	0.00196067712172772	0.1891	0.008349002		20.91	0.05	0	0	0.16	0.16

## Sheet: Fig5
Fig5 B: relative FUBP1 mRNA expression after FUBP1 knockdown in CD34+ cells
sh ctrl	sh FUBP1
0.94	0.5797
1.06	0.45
0.96	0.63
1.04	0.7
Fig5 D: GYPA+ cells after FUBP1 knockdown [%]
GYPA %							GYPA %
day 5	day 7	day 10	day 12	day 14	day 17		day 5	day 7	day 10	day 12	day 14	day 17
control							shFUBP
23.8	45.8	57.2	80.9	82.4	82.9		23.5	34.3	58.1	61.4	64.7	54.7	donor1
25	46.6	53	82.1	81.4	81.2		22	35	57	62	63.6	54
22	45.9	72.8	81.8	82	82.6		20.1	36.4	55.6	61.5	64.7	55.2
59.7	81	88.3	89.8	89.2	91.9		30.2	40.9	51.3	54.4	52.4	49.6	donor 2
56.6	79.6	90	89	88.1	86		29.5	40.2	48.6	53	53.2	51.7
54.7	81	89.9	91.3	88.9	85.1		27.6	41.4	48.7	49.2	51	54.2
40.3	63.316	75.2	85.816	85.333	84.95		25.483	38.033	53.216	56.916	58.266	53.233	median
18.388	18.868	16.907	4.694	3.755	3.826		4.193	3.163	4.224	5.443	6.694	2.149	STABW
Fig5 F: CD41+ cells after FUBP1 knockdown [%]
CD41 %							CD41 %
day 5	day 7	day 10	day 12	day 14	day 17		day 5	day 7	day 10	day 12	day 14	day 17
Control							shFUBP
17.6	15.1	21.9	11.7	7.4	3.2		20.2	14.4	8.8	5.4	2.9	2.1	donor 1
14.8	14.5	23.6	9.8	8.5	4		19.2	14.5	9.1	5.2	3.2	2.2
16.3	16.2	14.2	10.6	8.5	3.2		19.9	16.2	8.6	6.2	3	2.6
3.3	1.6	0.7	1.2	0.6	1.5		10.2	12.4	3.5	4.1	3	1.7	donor 2
2.2	1.9	0.6	0.8	0.1	1.6		11.9	12.4	5.5	4.9	3.4	1.2
3.4	3	0.7	0.8	0.1	0.5		12.8	12.5	5.6	4.1	4	1.3
9.6	8.716	10.283	5.816	4.2	2.333		15.7	13.733	6.85	4.983	3.25	1.85	median
7.332	7.210	11.000	5.385	4.331	1.332		4.544	1.561	2.303	0.808	0.408	0.546	STABW

## Sheet: Fig6
Fig6 B: relative FUBP1 mRNA expression after knockdown of FUBP1 in CD34+ cells
sh ctrl	sh FUBP1
1.1543	0.4846449
0.846331	0.6109259
1.095442	0.7524459
0.9042123	0.1934456
1	0.1476241
Fig6 C: number of colonies after FUBP1 knockdown
sh ctrl	sh FUBP1
350	191
282	183
169	216
183	218
244	132
205	129
142	144
128	144
Fig6 D and E: % of colony types after FUBP1 knockdown
	sh ctrl					sh FUBP1
CFU-E	3.14	4.61	4.92	2.44		0.52	0.0	0.0	0.78
BFU-E	17.14	15.96	23.77	20.98		6.28	8.2	8.33	6.98
CFU-GM	28.57	28.37	28.28	30.73		43.98	44.26	41.67	43.41
CFU-M	22.29	19.86	15.16	16.1		24.61	24.04	19.7	20.16
CFU-GEMM	4.0	2.48	2.05	2.44		1.57	0.55	0.76	0.0
CFU-G	24.86	28.72	25.28	27.32		23.04	23.08	29.55	28.68

## Sheet: SupplFig3
Suppl. Fig3 A: ChIP in CD34+ cells, % Input data
	TAL1 precipitation							IgG
P2 undiff.	0.05847064	0.08986208	0.253289	0.3250776			P2 undiff.	0.01115517	0	0.07324409	0.1329408
P2 erythroid diff.	0.5299236	0.7494251	1.078373	0.8943158			P2 erythroid diff.	0.0276583	0	0.06288484	0.0747831
	GATA1 precipitation							IgG
P2 undiff.	0.7758535	0.7188966	0.06833915	0.1064949	0.03938681	0.05969923	P2 undiff.	0.06354208	0.06578289	0.1094889	0.11335	0.003604104	0.009060813
P2 erythroid diff.	1.57883	1.589812	0.3424241	0.4100456	0.1153313	0.0911165	P2 erythroid diff.	0.06116525	0.0953156	0.03649534	0.02843588	0.001337594	0.006145969
	POLII precipitation							IgG
P2 undiff.	0.9099481		1.60087	1.493665			P2 undiff.	0.01115517	0	0.07324409	0.1329408
P2 erythroid diff.	2.194445	2.179287	3.008108	2.987329			P2 erythroid diff.	0.0276583	0	0.06288484	0.0747831
Suppl. Fig3 B: Chr18 enrichment in K562 cells
IgG	TAL1	GATA1	POLII
0.1167643	0.1035828	0.0920688	0.1035828
0.1035828	0.114296	0.08590323	0.1039443
0.002288878	0.02943867	0.01335808	0.09465721
0.004483547	0.02458388	0.007566575	0.1293056
Suppl. Fig3 B: Chr18 enrichment in CD34+ cells
undifferentiated					erythroid differentiated
IgG	TAL1	GATA1	POLII		IgG	TAL1	GATA1	POLII
0.01700	0.0171441	0.01255022	0.02		0.1809742	0.18	0.008053637	0.18100
0	0	0	0		0	0	0	0
0.0002735053	0.003236962	0.006962669	0.04749292		0.006772275	0.001965151	0.003457287	0.02746725
0	0	0	0		0	0	0	0
The marking indicates that values were below the detection threshold

## Sheet: SupplFig4
Suppl. Fig4: relative TAL1 and FUBP1 mRNA expression after overexpression of TAL1 in HEK293T cells
TAL1 expression			FUBP1 expression
ctrl	TAL1		ctrl	TAL1
0.97716	986.8361		0.9681707	1.781797
0.9438744	927.155		1.009285	1.844632
1.084227	1050.359		1.023374	1.857463
